# Supplementary material for: Sustained Circulating Bacterial Deoxyribonucleic Acid Is Associated With Complicated Staphylococcus aureus Bacteremia
Source: PubMed Central journal article supplement (PMC6475589; doi:10.1093/ofid/ofz090), 2019-02-26
Supplement: ofz090_suppl_supplement-information.pdf [file ofz090_suppl_supplement-information.pdf]

# 1 SUPPLEMENTARY INFORMATION

## 2 Supplemental Material and Methods

### 3 CFU measurements

4 Both kidneys and blood were collected from each mouse as described following  
5 end point euthanasia at selected time points. Both kidneys were homogenized in 5 mL  
6 PBS in M tubes using a gentleMACS™ Dissociator (Miltenyi Biotec, Inc; Catalog # 130-  
7 093-235). Femurs and tibiae were homogenized in 2 mL of PBS using 2.8 mm ceramic  
8 tubes (OMNI International; Catalog #19-628) for 2x30 second cycles in a Bead Ruptor  
9 homogenizer (OMNI International). Blood was treated with 0.1% Triton X-100 to lyse  
10 all blood cells. Ten-fold serial dilutions of tissue homogenates and treated blood were  
11 spread on blood agar plates (Teknova) and incubated under aerobic conditions at 37°C  
12 for 14-18 hours. The total bacterial burden in the kidneys and blood was determined by  
13 counting colonies in the highest dilution with non-overlapping colonies followed by  
14 multiplying the colony count with the dilution factor; the final product being expressed as  
15 CFU per organs. The detection limit was 133 cfu/bones (2 femur + 2 tibia), 400  
16 cfu/kidneys, and 67 cfu/mL blood.

### 17 Quantitative PCR

18 Genomic DNA from *S. aureus* USA300 (FPR3757) was extracted and used as the  
19 standard. The mass of the genomic DNA and concentration was used to calculate 16S  
20 copy number for the standard curve. Quantitative PCR was carried out on the purified  
21 sample DNA and known copy number of DNA standard. Briefly, 20 µl reaction mixtures

22 containing 5 µl DNA, 10 µl 2x Taqman Fast Advanced master mix (Thermo Fisher  
23 Scientific), 1 µl 20x Taqman primer/probe mix (Thermo Fisher Scientific), 4 µl nuclease-  
24 free water were prepared and subjected to real-time PCR with a QuantStudio7 instrument  
25 (Thermo Fisher Scientific). The thermal cycling conditions were 50°C for 2 minutes and  
26 95°C for 20 seconds, followed by 40 cycles of 95°C for 1 second and 60°C for 20  
27 seconds. Samples were run in triplicate and mean cycle threshold (Ct) values were  
28 applied to the standard curve generated in the same experiment to obtain corresponding  
29 copy number of bacteria then converted to copy number per mL. The qPCR assay has  
30 been qualified with lower limit of quantitation (LLOQ) and upper limit of quantitation  
31 (ULOQ) of 5 and 10<sup>7</sup> copies, respectively. For the limit of detection (LOD), a cycle  
32 threshold cut-off of 38 was set based on qualification experiments (Supplementary figure  
33 2). The 16S rRNA gene copy number can vary from 5-6 copies per bacterium so  
34 measurements reflect total genome copies rather than an absolute measurement of  
35 bacterial load. All PCR data and LODs were normalized by blood or plasma volume  
36 input into the PCR reaction and represented graphically as copies of 16S gene per mL of  
37 clinical sample.  
38

39 Supplemental Figures and Tables

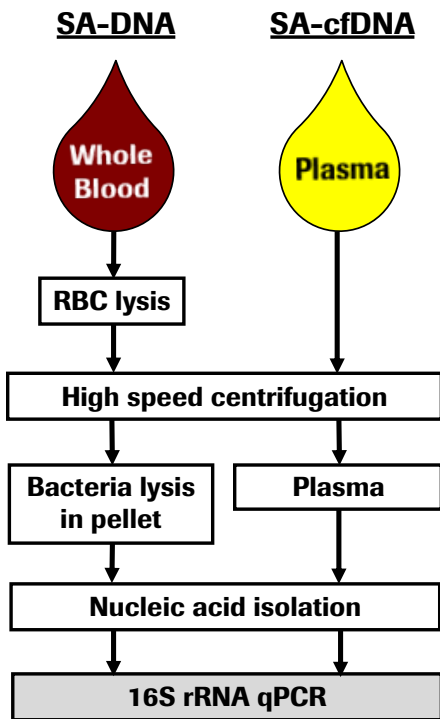

40

41 **Supplementary Figure 1.** Sample processing for SA-DNA and SA-cfDNA bacterial

42 DNA quantifications.

43

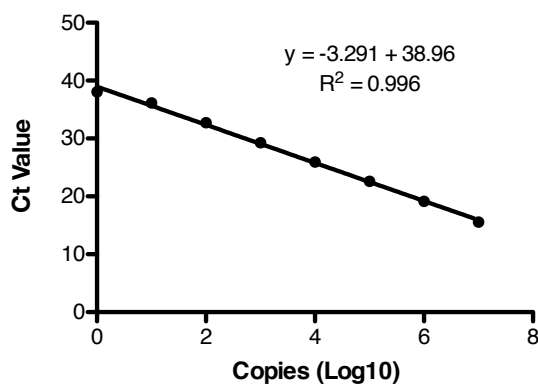

44

45 **Supplementary Figure 2.** Representative *S. aureus* genomic DNA standard curve.

| <b>Pathogen</b>                       | <b>Source</b>     | <b>Detected by qPCR</b> |
|---------------------------------------|-------------------|-------------------------|
| <i>Staphylococcus aureus USA300</i>   | ATCC® BAA-1556    | +                       |
| <i>Staphylococcus aureus USA300</i>   | NRS384            | +                       |
| <i>Staphylococcus aureus USA100</i>   | NRS382            | +                       |
| <i>Staphylococcus aureus USA400</i>   | NRS123            | +                       |
| <i>Staphylococcus aureus MN8</i>      | NRS112            | +                       |
| <i>Staphylococcus aureus Reynolds</i> | NRS102            | +                       |
| <i>Staphylococcus aureus N315</i>     | NRS70             | +                       |
| <i>Staphylococcus aureus Mu50</i>     | NRS1              | +                       |
| <i>Staphylococcus aureus COL</i>      | NRS100            | +                       |
| <i>Staphylococcus aureus Newman</i>   | ATCC® 25904       | +                       |
| <i>Klebsiella pneumonia</i>           | ATCC® BAA-1705D-5 | BLD                     |
| <i>Acinetobacter baumannii</i>        | ATCC® 19606D-5    | BLD                     |
| <i>Enterococcus faecalis</i>          | ATCC® 29212Q-FZ   | BLD                     |
| <i>Salmonella enterica</i>            | ATCC® 700931D-5   | BLD                     |
| <i>Streptococcus pneumoniae</i>       | ATCC® 33400D-5    | BLD                     |
| <i>Pseudomonas aeruginosa</i>         | ATCC® 47085D-5    | BLD                     |
| <i>Bacteroides fragilis</i>           | ATCC® 25285D-5    | BLD                     |
| <i>Escherichia coli</i>               | ATCC® 10798D-5    | BLD                     |
| Human genomic DNA                     | Promega           | BLD                     |

46 Below limit of detection (BLD)

47 **Supplementary Table 1.** DNA of a variety of organisms was tested for cross-reactivity  
48 with the *S. aureus* specific qPCR primers ( $>10$  ng or  $>1 \times 10^7$  copies/reaction DNA for  
49 bacteria strains and 500ng/reaction for human genomic DNA).

| Characteristic                         | Patient data<br>(n = 73) |
|----------------------------------------|--------------------------|
| Age (Min-Max)                          | 51 (21-90)               |
| Male / Female                          | 59 / 14                  |
| MSSA / MRSA                            | 48 / 25                  |
| In-hospital mortality                  | 5                        |
| Treatment duration, mean days $\pm$ SD | 42 $\pm$ 23              |
| Infection Source                       |                          |
| Line                                   | 6                        |
| Endocarditis                           | 13                       |
| Skin & soft tissue infection           | 10                       |
| Pneumonia                              | 5                        |
| Osteoarticular                         | 32                       |
| Urinary tract infection                | 3                        |
| Unknown                                | 4                        |

50

51 **Supplementary Table 2.** Demographic and clinical data of bacteremia patient cohort.

52

**A**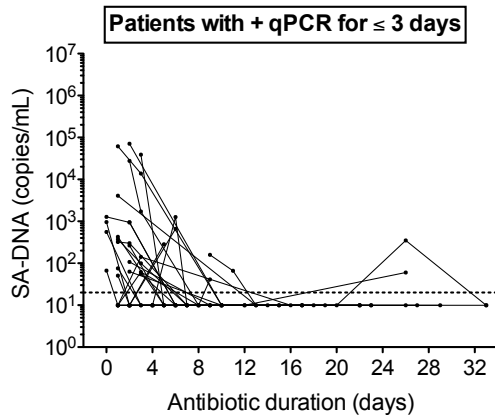**B**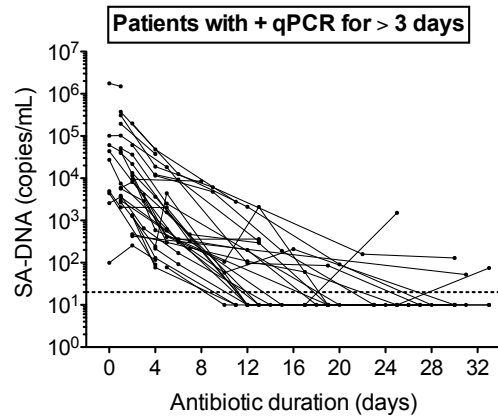

53

54 **Supplementary Figure 3.** *S. aureus* DNA levels in blood from longitudinal bacteremic  
55 patients separated based on duration of qPCR positive signal (A, B). Lines denote data  
56 from individual patients over time. Day 0 indicates start of empiric antibiotics. Dashed  
57 line: Limit of detection (20 copies/mL).

58

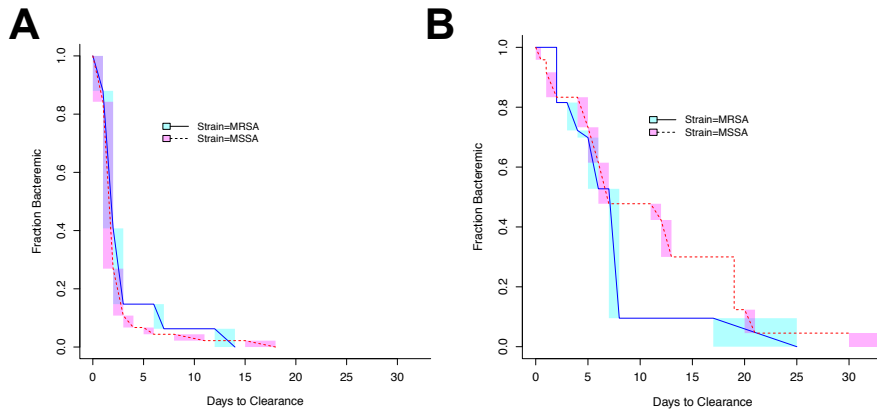

59

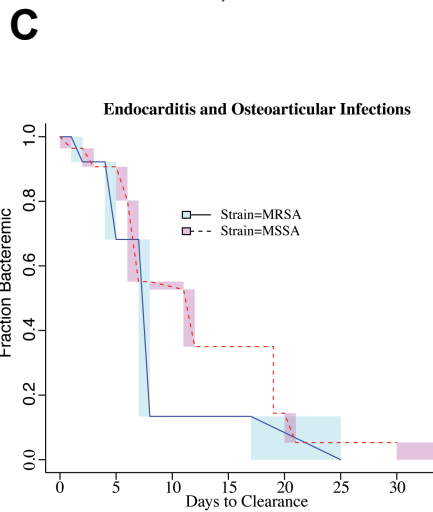

60

61 **Supplementary Figure 4.** Longer duration of SA-DNA positivity in patients with MSSA  
 62 vs MRSA infections. A. Duration of blood culture positivity in patients with MRSA vs  
 63 MSSA. B. Longer duration of SA-DNA detectable in blood from patients with MSSA  
 64 infections vs. MRSA. C. Longer duration of SA-DNA detected in blood from patients  
 65 with MSSA infections vs. MRSA in patients with complicated endocarditis or  
 66 osteoarticular infections. Shading indicates the uncertainty in the interval censored data.

67



68

69

|                                 | Culture Time to Positivity |         |        | SA-DNA     |         |         | SA-cfDNA   |         |         |
|---------------------------------|----------------------------|---------|--------|------------|---------|---------|------------|---------|---------|
|                                 | Spearman r                 | P value |        | Spearman r | P value |         | Spearman r | P value |         |
| <b>Culture time to +</b>        | 1                          | N/A     |        | -0.449     | ***     | 0.0003  | -0.280     | ns      | 0.0725  |
| <b>SA-DNA</b>                   | -0.449                     | ***     | 0.0003 | 1.000      | N/A     |         | 0.714      | ****    | <0.0001 |
| <b>SA-cfDNA</b>                 | -0.280                     | ns      | 0.0725 | 0.714      | ****    | <0.0001 | 1.000      |         | N/A     |
| <b>Serum PCT</b>                | -0.343                     | **      | 0.0032 | 0.613      | ****    | <0.0001 | 0.375      | *       | 0.0144  |
| <b>WBC counts</b>               | 0.073                      | ns      | 0.5443 | 0.228      | ns      | 0.0742  | 0.245      | ns      | 0.1179  |
| <b>% Neutrophils</b>            | -0.217                     | ns      | 0.0821 | 0.561      | ****    | <0.0001 | 0.526      | ***     | 0.0008  |
| <b>Antibiotic Duration</b>      | -0.262                     | *       | 0.0273 | 0.375      | **      | 0.0029  | 0.293      | ns      | 0.0596  |
| <b>High WBC Duration</b>        | 0.039                      | ns      | 0.7591 | 0.198      | ns      | 0.1465  | 0.383      | *       | 0.0176  |
| <b>Blood culture + Duration</b> | -0.059                     | ns      | 0.6305 | 0.392      | **      | 0.0021  | 0.368      | *       | 0.0211  |
| <b>SA-DNA+Duration</b>          | -0.259                     | *       | 0.0500 | 0.686      | ****    | <0.0001 | 0.516      | **      | 0.0025  |

70

71 **Supplementary Table 3.** Spearman correlations between markers of clinical severity,  
72 initial qPCR bacterial load and blood culture time to positivity. PCT, blood counts, and  
73 bacterial PCR measurements were made within 3 days of starting antibiotic therapy.

74
